# Supplementary material
Source: Royal Society of Chemistry journal article supplement (doi:10.1039/d6tc00074f)
Supplement: d6tc00074f1.pdf [file d6tc00074f1.pdf]

## Supplementary Information

### Room-Temperature Electrochemical Co-deposition of Cu-MOF/CNT Heterostructures on Carbon Fibers for Efficient Microwave Absorption at Low Filler Loading

Yuting Guo<sup>a,†</sup>, Qinyang Xiong<sup>a,†</sup>, Xiaojie Yang<sup>a</sup>, Ke Han<sup>a</sup>, Jiahao Gao<sup>a</sup>, Danlin Yan<sup>b</sup>, Xuejun Zhang<sup>a,\*</sup>, Jiangman Sun<sup>a,\*</sup>, Yanhong Tian<sup>a\*</sup>

<sup>a</sup> Key Laboratory of Carbon Fiber and Functional Polymers, Ministry of Education, State Key Laboratory of Organic-Inorganic Composites, College of Materials Science and Engineering, Beijing University of Chemical Technology, Beijing, 100029, China

<sup>b</sup> School of Science, Guangdong University of Petrochemical Technology, Maoming, Guangdong, 525000, China

† These authors contribute equally

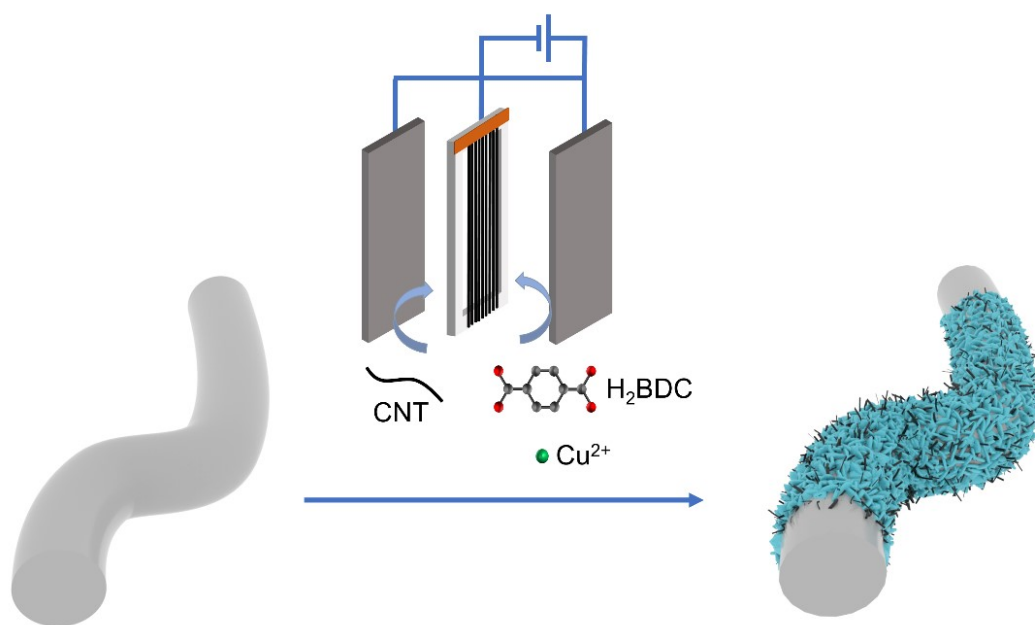

**Figure S1.** Schematic illustration of the preparation process of Cu-MOF/CNT@CF

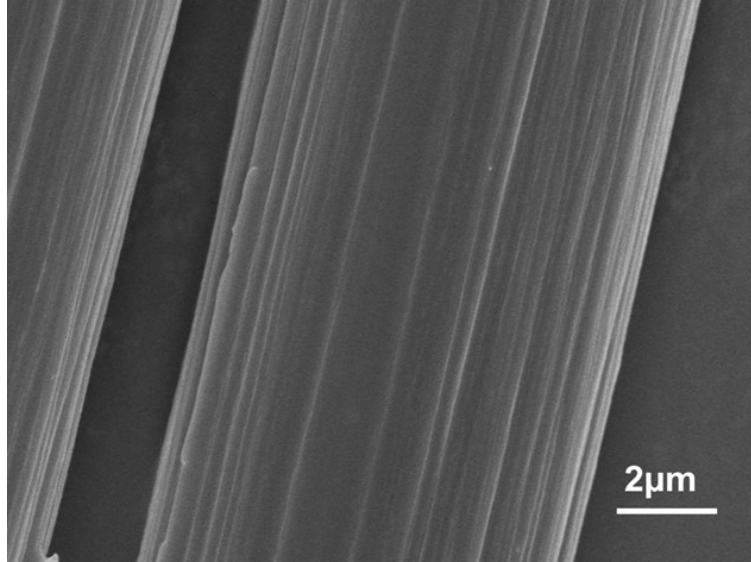

Figure S2. SEM images of SA@CF

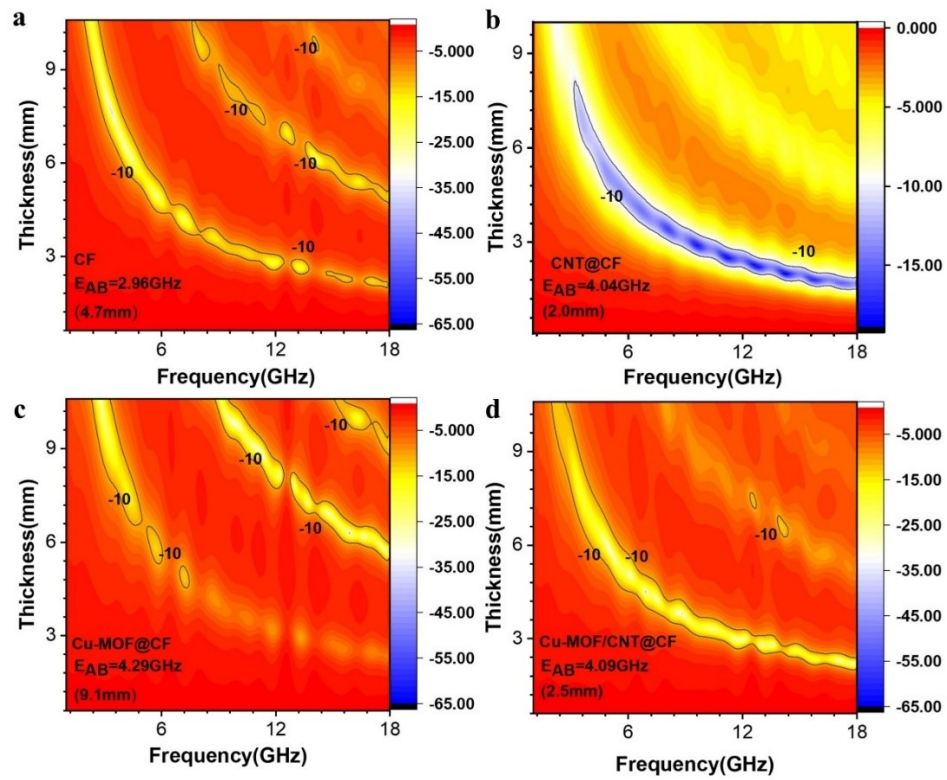

Figure S3. 2D diagrams of reflection loss for the as-prepared samples: (a) CF, (b) CNT@CF, (c) Cu-MOF@CF, (d) Cu-MOF/CNT@CF

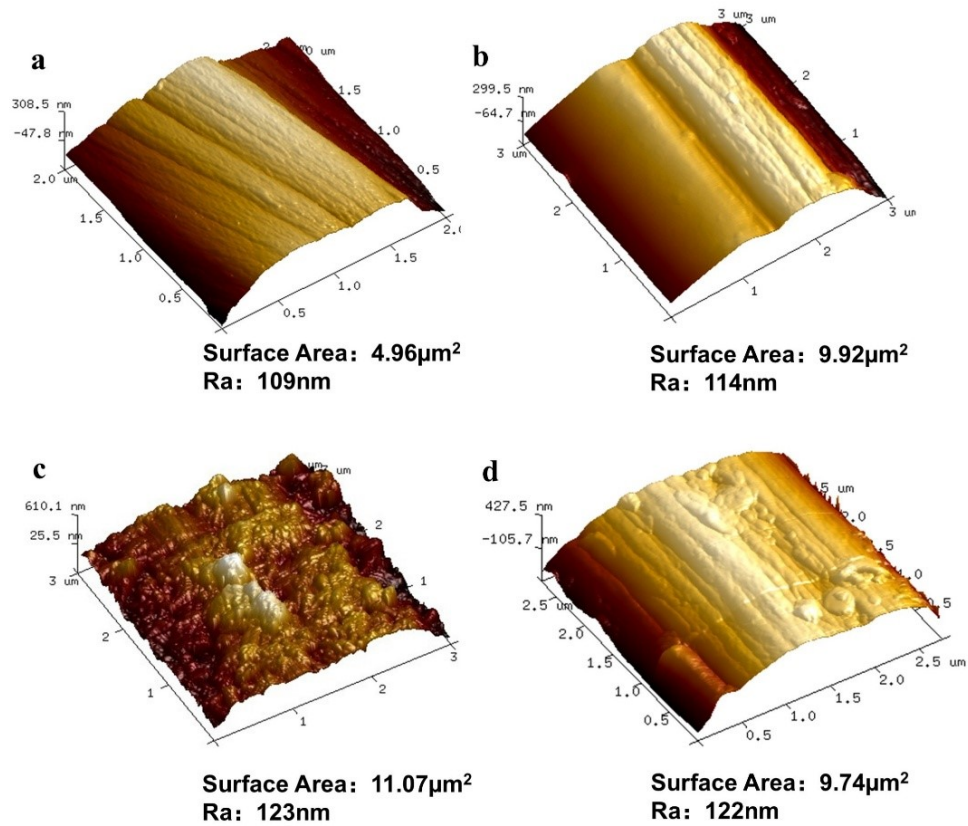

Figure S4. AFM images of (a) CF, (b) CNT@CF, (c) Cu-MOF@CF, (d) Cu-MOF/CNT@CF

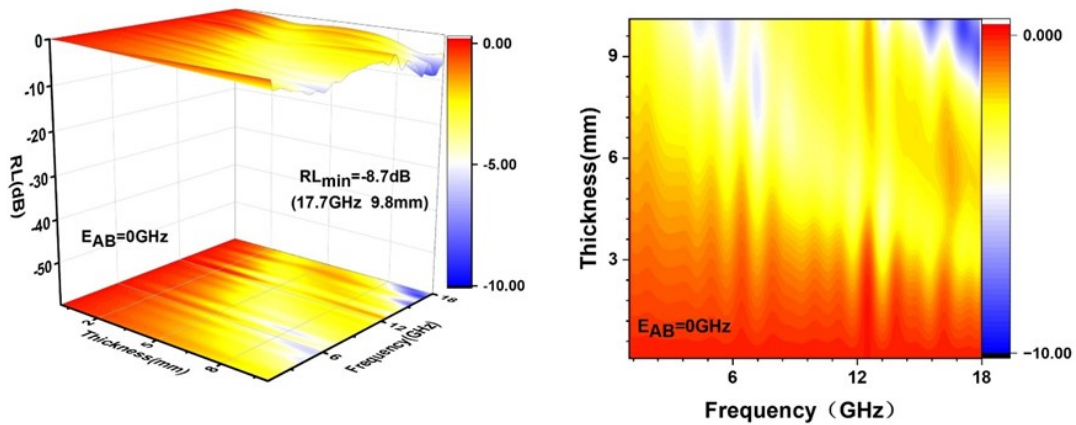

Figure S5. 3D diagrams and 2D diagrams of reflection loss for Cu-MOF

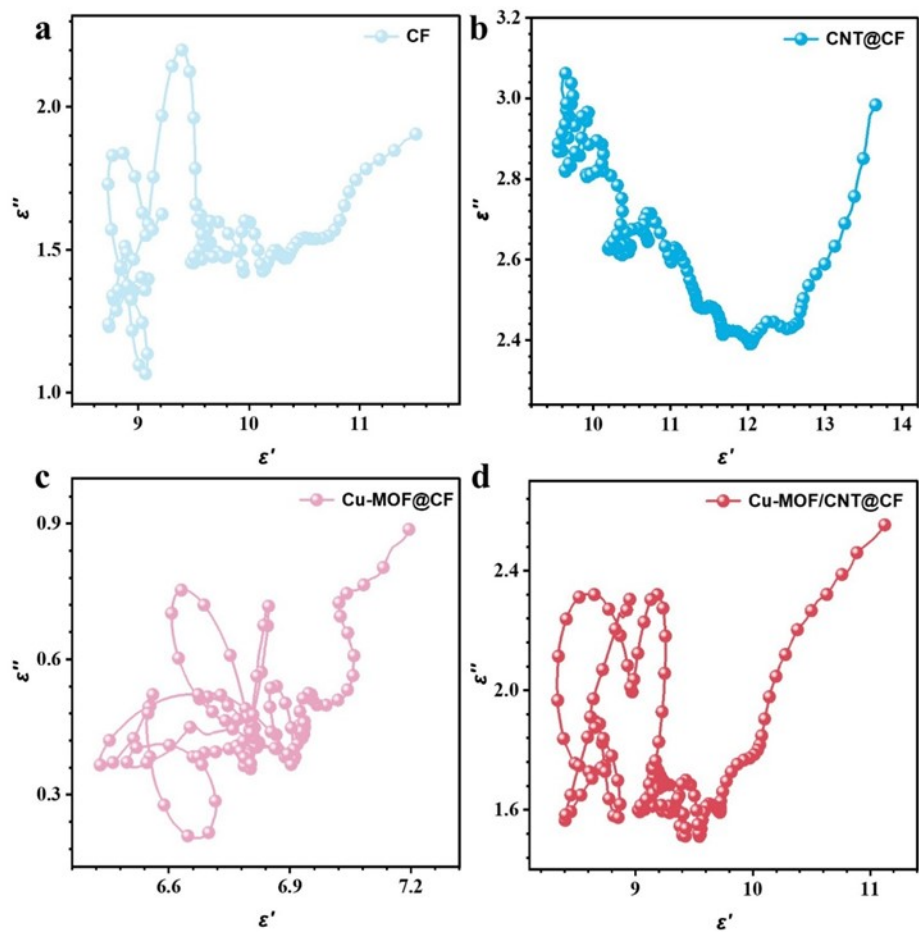

**Figure S6.** Cole-Cole curves of (a) CF, (b) CNT@CF, (c) Cu-MOF@CF, (d) Cu-MOF/CNT@CF
